# Supplementary material for: Ten Simple Rules for Teaching Bioinformatics at the High School Level
Source: PubMed Central journal article supplement (PMC3203051; doi:10.1371/journal.pcbi.1002243), 2011-10-27

## Teaching Bioinformatics in the High School Classroom

David Form  
Nashoba Regional High School  
dform@nrsd.net

1

## Why teach bioinformatics in high school?

- Relevant, real life examples
- It's visual
- Allows for inquiry based approach
- Allows for personalization
- Allows for reinforcement of basic concepts
- It's cheap, with no cleanup required!

2

## Students Develop a Research Tool Kit That Will be Useful in College

- Access information from online genomics databases
- Use BLAST to
  - Compare Genes and Proteins
  - Find model organisms
- Use PubMed to find relevant papers

3

## Models for Disease

A high school level genomics/  
bioinformatics course

4

## Goals

- Develop an understanding of the relationship between genes, proteins and disease
- Learn to ask the types of questions that are asked by scientists
- Conduct independent genomics-based research
- Develop a toolkit of online bioinformatics tools that they can use in college or in a laboratory setting

5

## Models for Disease Presents a series of case studies

- Specific diseases are used as models for investigating the relationships between genes, proteins and disease
- Students apply newly acquired skills towards independent research.

6

## 3 Strands Taught in Parallel

- How to use various online bioinformatics databases and tools
- Genomics and molecular genetics
- Genetic basis of disease

7

## The Curriculum

8

## Introductory Unit

### Modeling the Genome of HIV

9

## The Genome of HIV

- Students construct
  1. A 3-D model of HIV
  2. A poster containing
    - The complete genome of HIV
    - Function and nucleotide sequence of each of the genes
    - Function and amino acid sequence of major proteins
- Students relate structures in 3-D model to specific genes and proteins in their genomic poster
- Students produce an online genomic scavenger hunt for a different virus

10

## Goals for Unit

- Associate events in life cycle of HIV with specific
  - Structures
  - Genes
  - Proteins
- Learn to use NCBI Genome to find genomic information

11

- NCBI Genome for HIV 1
- (<http://www.ncbi.nlm.nih.gov/sites/entrez?Db=genome&Cmd=ShowDetailView&TermToSearch=12171>)

12

# Part I

## Modeling Genetic Disorders

13

# Genetic Disorders

- **Genetics**
  - Structure of genomes
    - Introns/exons
    - mRNA structure
    - Promoters
    - Coding and non-coding sequences
  - Recessive disorders
  - Dominant disorders
  - Sex-linked disorders
  - Complex disorders
    - Aging and obesity
- **Bioinformatics**
  - Use of genomic databases
    - NCBI, GeneCards, Genetics Home Reference
  - BLAST
    - Finding suitable laboratory models for disease

14

## First Major Culminating Assignment

- Choose a genetic disorder
- Symptoms
- Gene(s) involved
  - Nucleotide sequence
  - Chromosomal address
  - Number of alternative transcripts
  - Gene expression profile
- Protein encoded by the gene
  - Function and relationship to symptoms
  - Amino acid sequence
- Use BLAST to find a suitable laboratory model for this disorder

15

## Research limited to three resources

- Genetics Home Reference
- Gene Cards
- NCBI

16

## Example of Student Work

### Wilson's Disease

(see accompanying PDF for student's work)

17

## Bridge

### The Monellin Project

18

## Designing a Novel Sweetener: The Monellin Project

- Students work in groups to design a bioengineered protein for use as a natural non-nutritive sweetener
  - Demonstrate uniqueness of their protein
  - Compare natural monellin with genetically engineered monellin
  - Alter the active site to improve sweetness

19

## Part II

### Modeling Infectious Disease

20

# Infectious Disease

- **Units**
  - **Cholera and the Germ Theory of Disease**
    - The cholera toxin
    - Transmission of disease through water
  - **Outbreaks of pathogenic E. coli**
    - Lateral transfer of toxins and the evolution of disease
    - Mechanisms of gene transfer between bacteria
  - **HIV**
    - Evolutionary origin of HIV
    - The case of the Florida dentist
    - CCR5 gene and resistance to AIDS
- **Bioinformatics**
  - Comparisons of Protein Structure
    - Aligning primary structures of proteins
    - 3-D models of proteins
    - Domains
  - Multiple Alignments
  - Constructing phylogenetic trees

21

# Comparison of cholera toxin with E. coli enterotoxin

Using 3-D protein modeling software  
And BLAST

22

- FirstGlance in Jmol
- (<http://molvis.sdsc.edu/fgij/>)

23

# Part III

Independent Research Project

24

## Final Project: Independent Student Research

- PowerPoint and Research Paper
  - Must use tools covered by this class
  - Some topics
    - Genes involved in
      - Speech
      - Intelligence
      - Alcoholism
    - Genetic basis for lactose intolerance
    - Evolutionary origin of the plague

25

## Incorporating Bioinformatics into the Introductory Biology Curriculum

26

## Goals

- Introduce students to genomics databases and tools
- Reinforce topics/concepts in curriculum
- Personalize the curriculum
- Application to real life topics
- Empower students by using online tools

27

## Activities

- Evolution of whales
- The vitamin C pseudogene as molecular evidence for evolution
- rRNA and the three domains of life
- What is a Tasmanian wolf?
- Homeotic genes and the evolution of eyes

28

## Whales on Trees

Using DNA evidence to help unravel the ancestry of whales

29

## Mesonychids: Wolf-like or Wolf-Related?

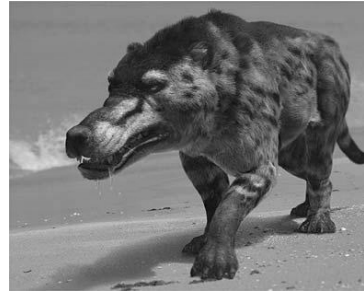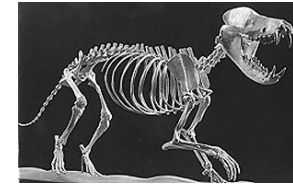

30

Students use DNA sequences to construct phylogenetic trees in order to determine the closest living relatives of the whales

31

## Relationship of whales to various mammals

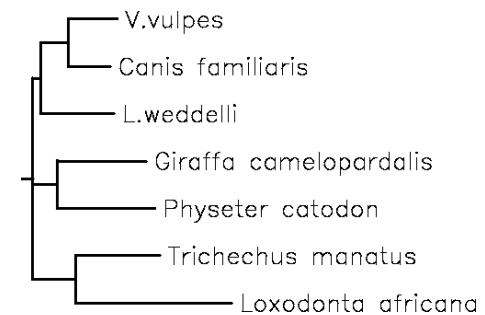

32



# Relationship of whales to various ungulates

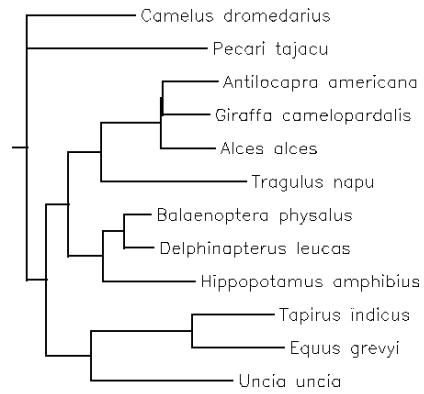

Supplement: pcbi.1002243.s003.pdf [file pcbi.1002243.s003.pdf]
